# Supplementary material
Source: PubMed Central journal article supplement (PMC2941155)
Supplement: NIHMS228892-supplement-01.pdf [file NIHMS228892-supplement-01.pdf]

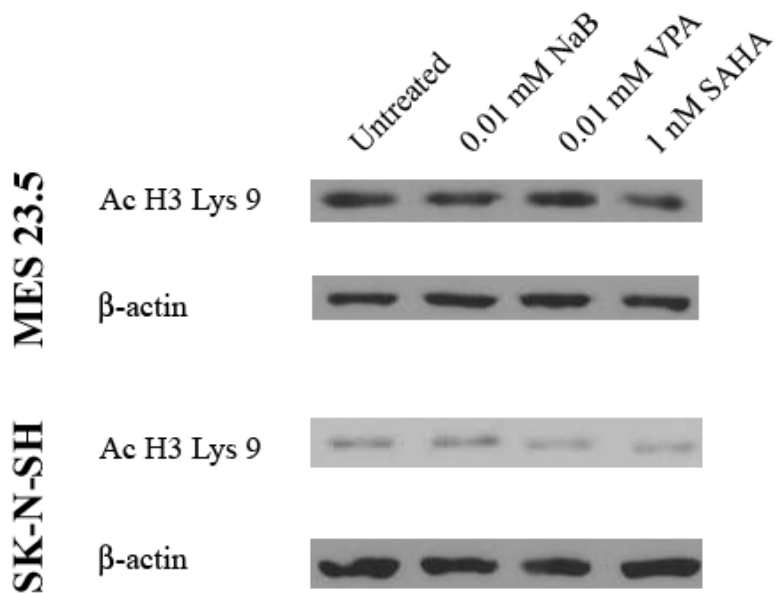

**Supplemental Figure 1: Administration of low-levels of HDACIs does not alter histone H3 hyperacetylation.**

Representative western blots of MES 23.5 and SK-N-SH cells treated with HDACIs for 24hrs. show no change in histone H3 Lys 9 acetylation (Ac H3 Lys 9). β-actin demonstrates equal loading and transfer of samples.
